# Supplementary material for: Polyphenols Modulate Alzheimer’s Amyloid Beta Aggregation in a Structure-Dependent Manner
Source: PubMed Central journal article supplement (PMC6521010; doi:10.3390/nu11040756), 2019-03-31
Supplement: nutrients-11-00756-s001.pdf [file nutrients-11-00756-s001.pdf]

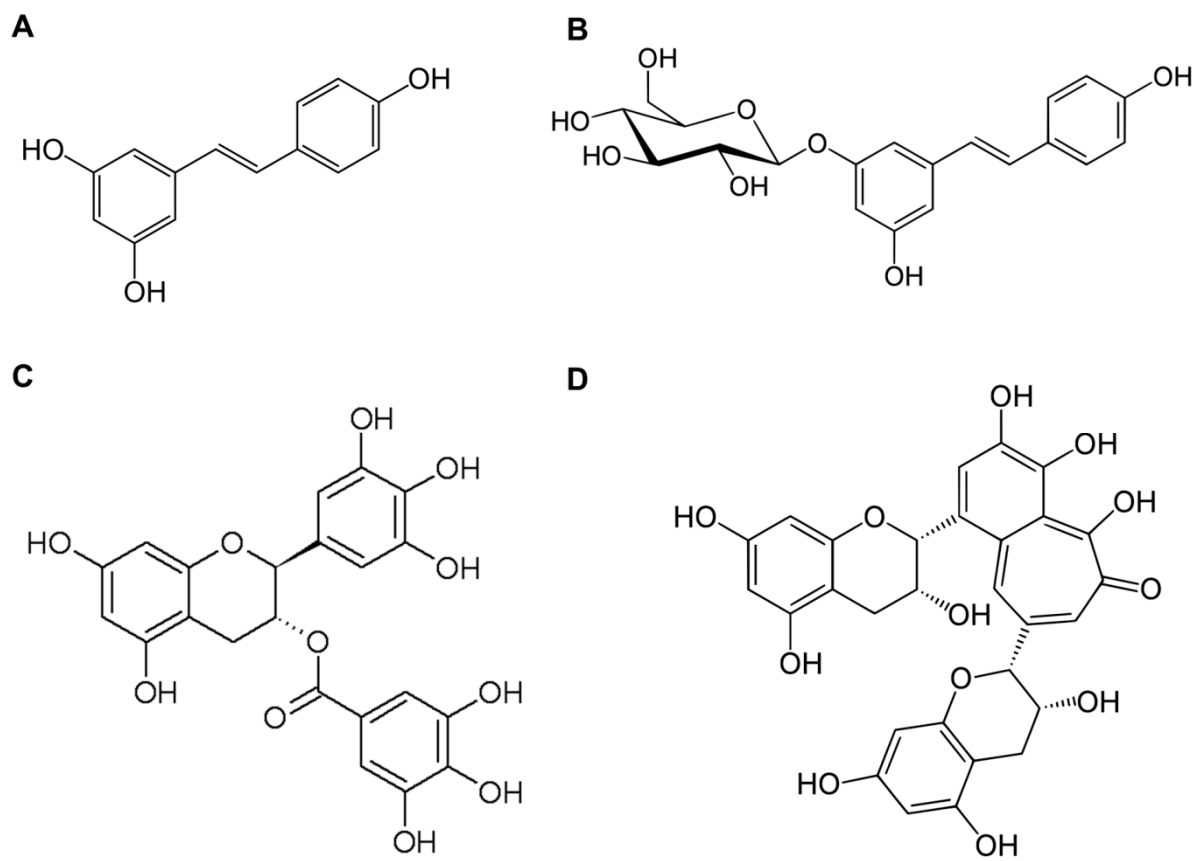

**Figure S1.** Chemical structure of resveratrol (A), piceid (B), galocatechin gallate (C) and theaflavin (D).

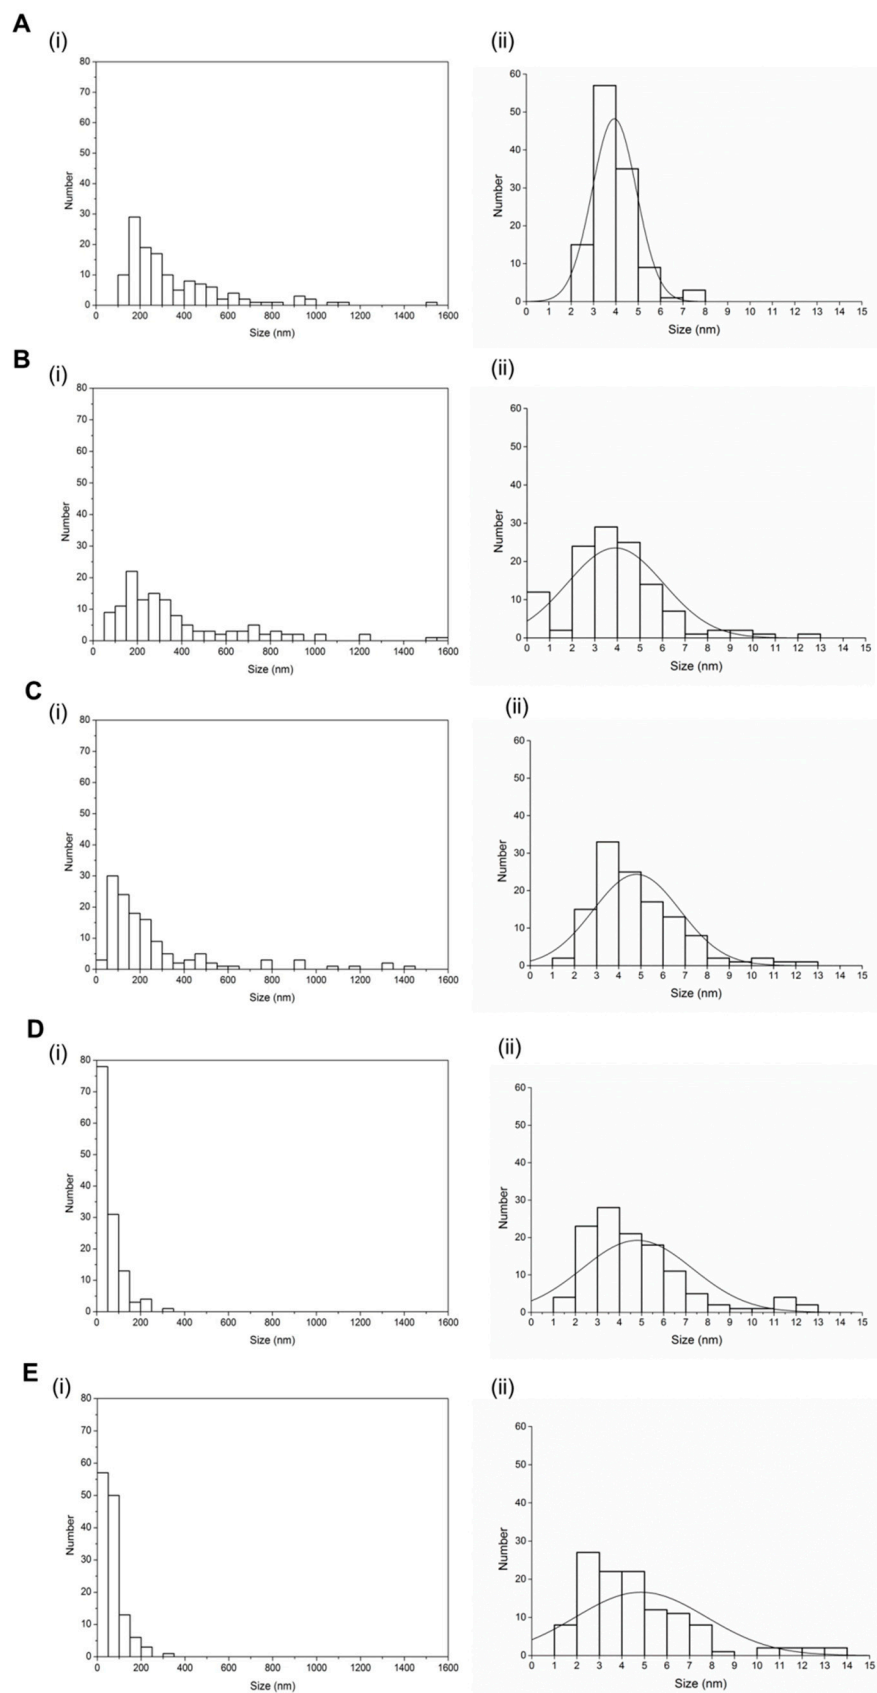

**Figure S2.** (i) Length and (ii) height distribution of A $\beta$ <sub>42</sub> aggregates obtained from 24 h incubation (A) without polyphenols and with (B) resveratrol, (C) piceid, (D) gallic acid and (E) theaflavin. A $\beta$ <sub>42</sub> was incubated at 80  $\mu$ M in Tris buffer (20 mM, pH 7.4). The samples were using atomic force microscopy (AFM) in a dynamic force mode. All AFM operations were performed in an

automated moisture control box with 30–40% humidity at room temperature. The length and height of A $\beta$ <sub>42</sub> aggregates were analysed using Image J and SPI software, respectively.

**Table S1.** The current detected for peak potentials of polyphenol (80  $\mu$ M) solutions incubated at 37 °C for 0 h, 12 h and 24 h.

| Compounds     | Current ( $\mu$ A) |      |      |   |      |      |      |      |      |      |      |      |      |      |
|---------------|--------------------|------|------|---|------|------|------|------|------|------|------|------|------|------|
|               | 0 h                |      |      |   |      |      | 12 h |      |      |      | 24 h |      |      |      |
|               | 1                  | 2    | 3    | 4 | 5    | 6    | 7    | 1    | 2    | 3    | 4    | 1    | 2    | 3    |
| GCG           |                    |      |      |   |      | 0.7  |      | 0.65 |      |      | 0.44 | 0.5  |      |      |
| Theaflavin    | 1.86               | 0.54 |      | 1 | 1.04 | 0.97 | 1.43 | 0.97 |      | 0.49 | 0.77 | 0.64 | 0.45 | 0.72 |
| Resveratrol   | 1.43               | 0.75 | 1.05 |   |      | 1.43 |      | 1.13 |      | 0.59 | 0.83 | 0.45 | 0.38 | 0.62 |
| Picied        |                    | 0.53 |      |   |      | 1.15 |      |      | 0.65 | 0.65 | 1.46 |      | 0.61 | 1.18 |
| A $\beta$ -42 |                    |      |      |   |      | 0.29 |      |      |      |      |      |      |      |      |

**Table S2.** The current detected for peak potentials of polyphenol (80  $\mu$ M) solutions incubated with A $\beta$ <sub>42</sub> at 37 °C for 0 h, 12 h and 24 h.

| Polyphenols | Current ( $\mu$ A) |      |      |      |      |      |      |      |      |      |      |   |      |
|-------------|--------------------|------|------|------|------|------|------|------|------|------|------|---|------|
|             | 0 h                |      |      |      | 12 h |      |      |      | 24 h |      |      |   |      |
|             | 1                  | 2    | 3    | 4    | 1    | 2    | 3    | 4    | 1    | 2    | 3    | 4 |      |
| GCG         | 0.28               |      | 0.45 |      | 0.38 |      |      |      | 0.33 |      |      |   |      |
| Theaflavin  | 0.64               |      | 0.49 | 0.99 | 0.28 |      | 0.24 | 0.34 |      | 0.26 | 0.3  |   |      |
| Resveratrol |                    | 0.61 | 0.77 |      |      |      | 0.36 | 0.59 |      |      | 0.36 |   |      |
| Picied      |                    | 0.42 | 0.64 |      |      | 0.53 | 0.58 | 1.3  |      | 0.47 |      |   | 0.93 |
